# Supplementary material
Source: PubMed Central journal article supplement (PMC3264132)

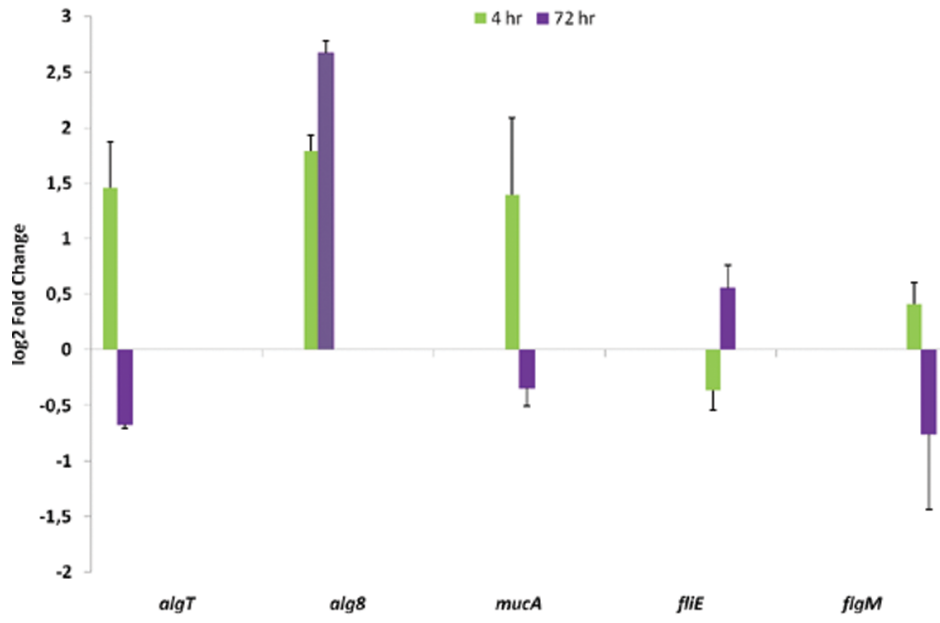

Figure 1. qRT-PCR quantification of selected transcripts in KT2440 after 4 and 72 hr matrix stress

Supplement: supp_78.3.676_AEM-AEM06150-11-s01.pdf [file supp_78.3.676_AEM-AEM06150-11-s01.pdf]
